# Supplementary material
Source: HighWire-hosted journal article supplement (https://cmajopen.ca/highwire/filestream/90282/field_highwire_adjunct_files/1/open-2022-0140-2-at.pdf)
Supplement: open-2022-0140-2-at.pdf [file open-2022-0140-2-at.pdf]

Supplemental File 2 - Coding Process

| Quote                                                                                                                      | Core subject(s)                            | Descriptor word(s)             | Category  | Theme                                                      |
|----------------------------------------------------------------------------------------------------------------------------|--------------------------------------------|--------------------------------|-----------|------------------------------------------------------------|
| It was just a hellish process for me but I have, you know, the knowledge that I signed my mom up [for MAID] (Interview 24) | I signed mom up [for MAID]                 | Hellish process, knowledge     | Guilt     | Felt guilt and trauma about their role in the MAID process |
| it [MAID] created a total rift with my sister and I, really for a year and a half to two years. (Interview 23)             | [MAID] created rift with sister            | For year and half to two years | Judgement | From relatives                                             |
| [spouse] didn't want no one to know. ... she didn't even want her father to know, her brother to know. (Interview 8)       | Didn't want father, brother to know [MAID] | [spouse]                       | Secrecy   | Person having MAID did not want others to know             |
